# Supplementary material for: Glycyrrhiza Polysaccharide-Adjuvanted Liposomal Vaccine Potentiates Tumor Immunotherapy through Lymph Node-Targeted Modulation of the DC-T Cell Axis
Source: Research Square preprint supplement (doi:10.21203/rs.3.rs-7233728/v1), 2025-07-30
Supplement: Supplementary file 1 [file 12d332d23275e70a95f1caa1.docx]

**
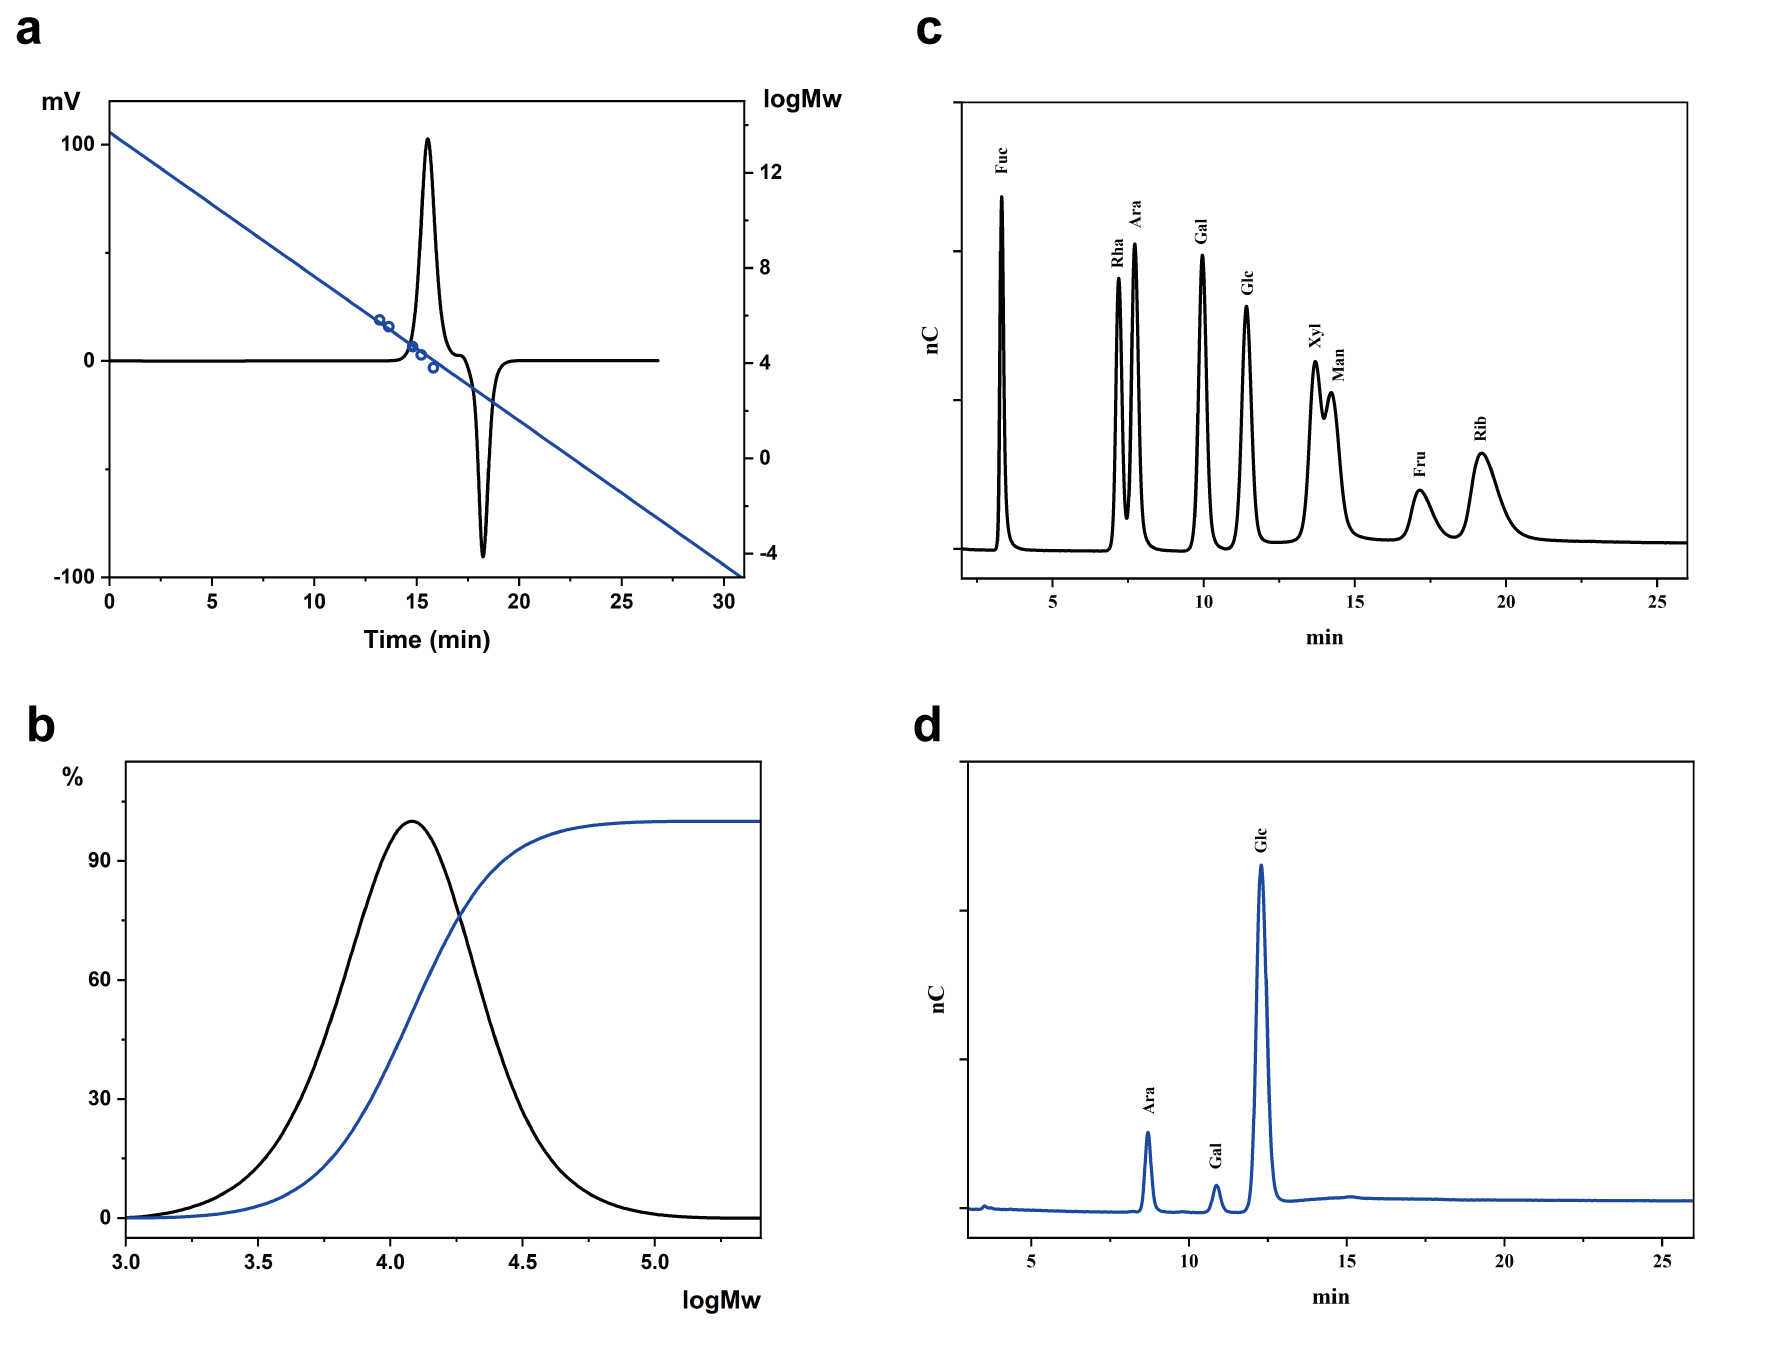
**

**Fig S1** Molecular weight and monosaccharide composition of NGUP. (**a-b**) Molecular weight of NGUP. (**c-d**) Monosaccharide composition of NGUP.

**
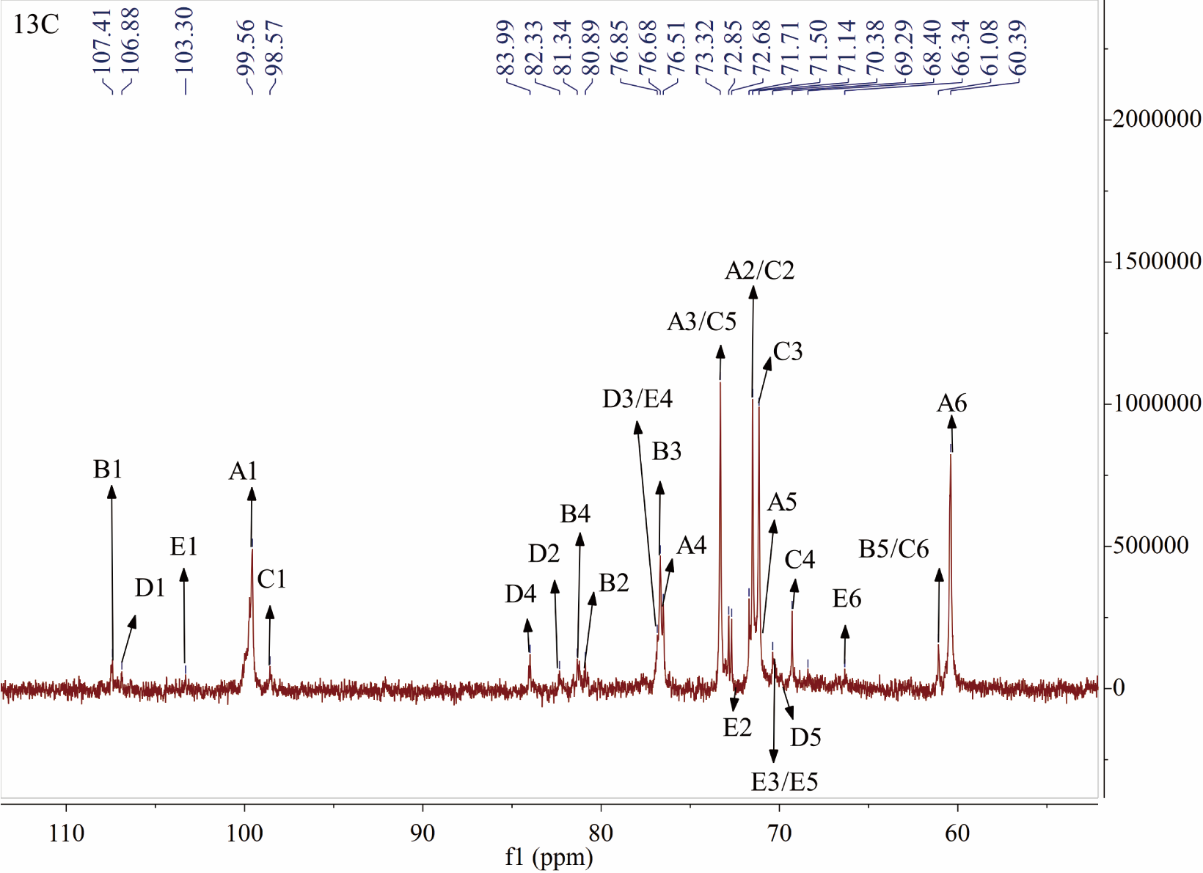
**

**
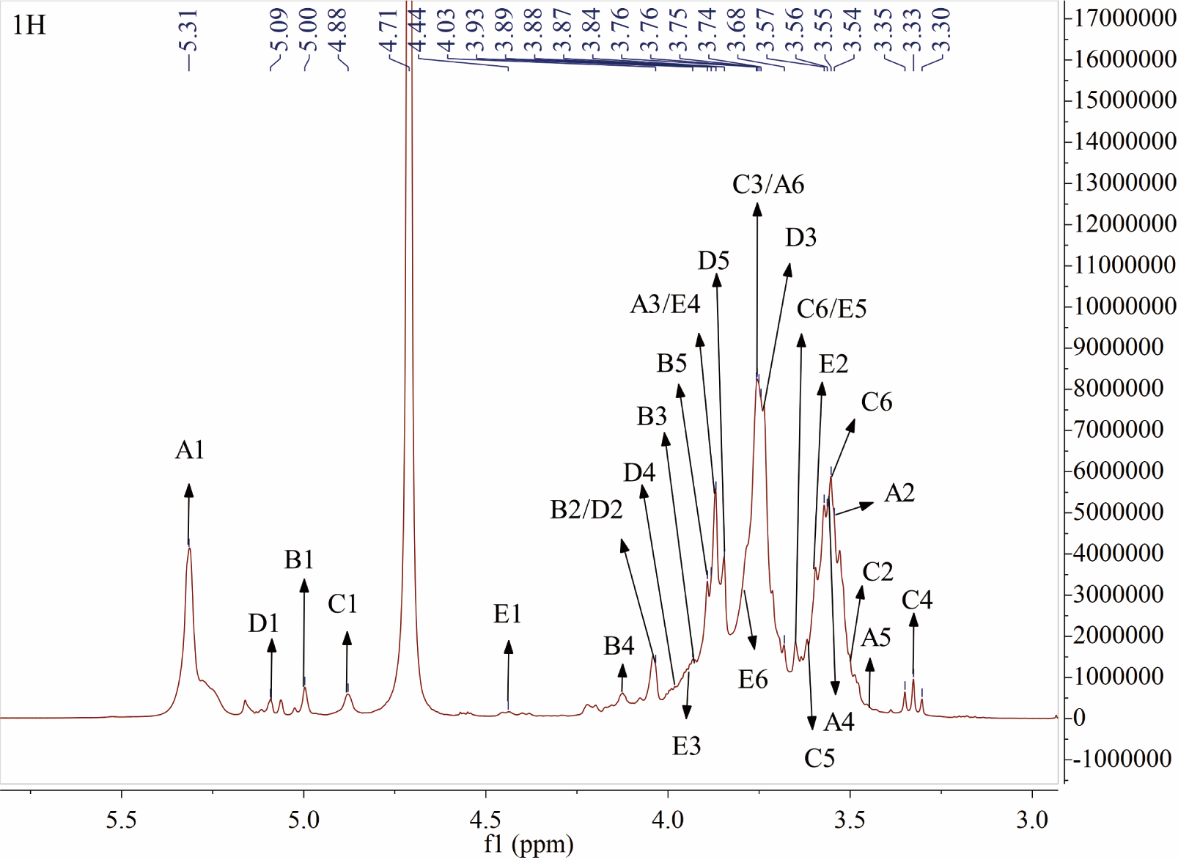
Fig S2** 13C NMR spectrum.

**Fig S3** 1H NMR spectrum.


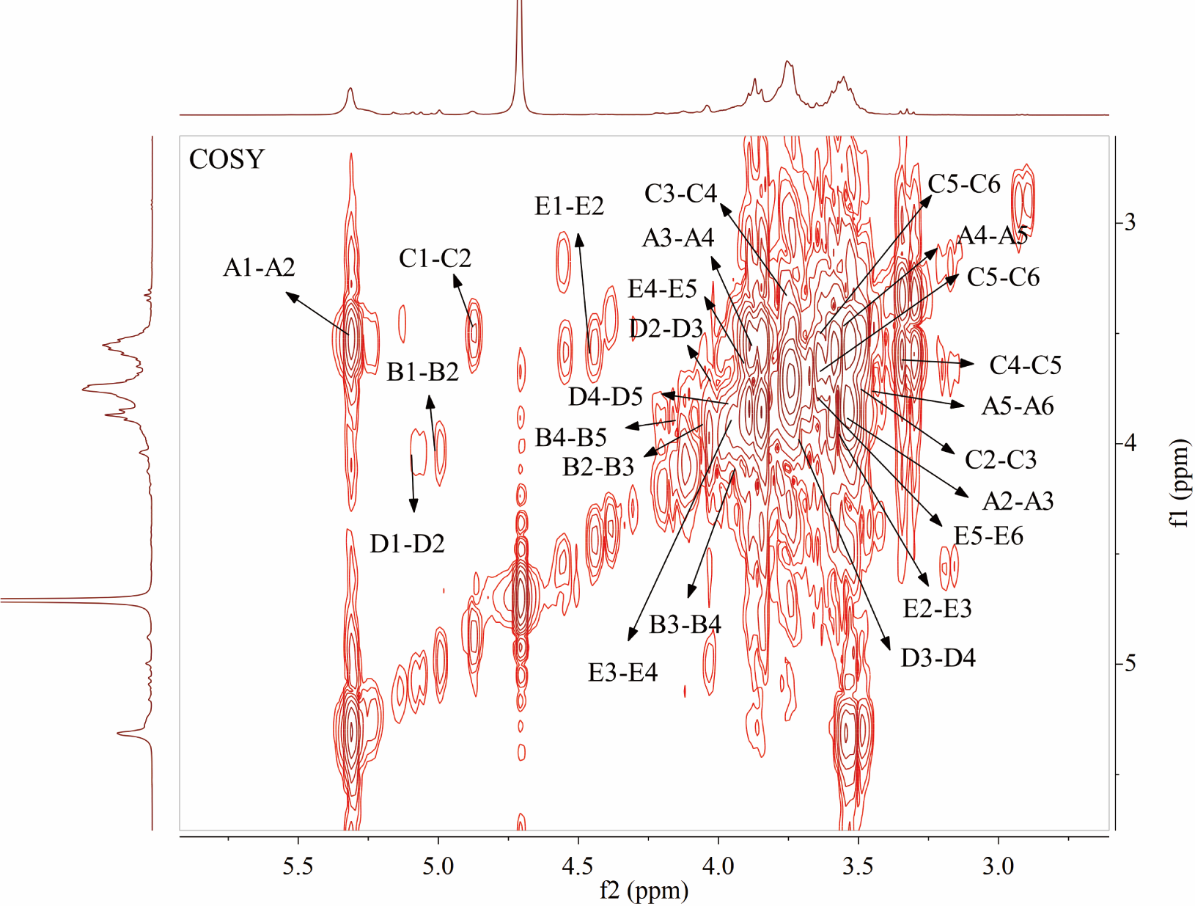


**Fig S4** 1H-1H COSY spectrum.

**
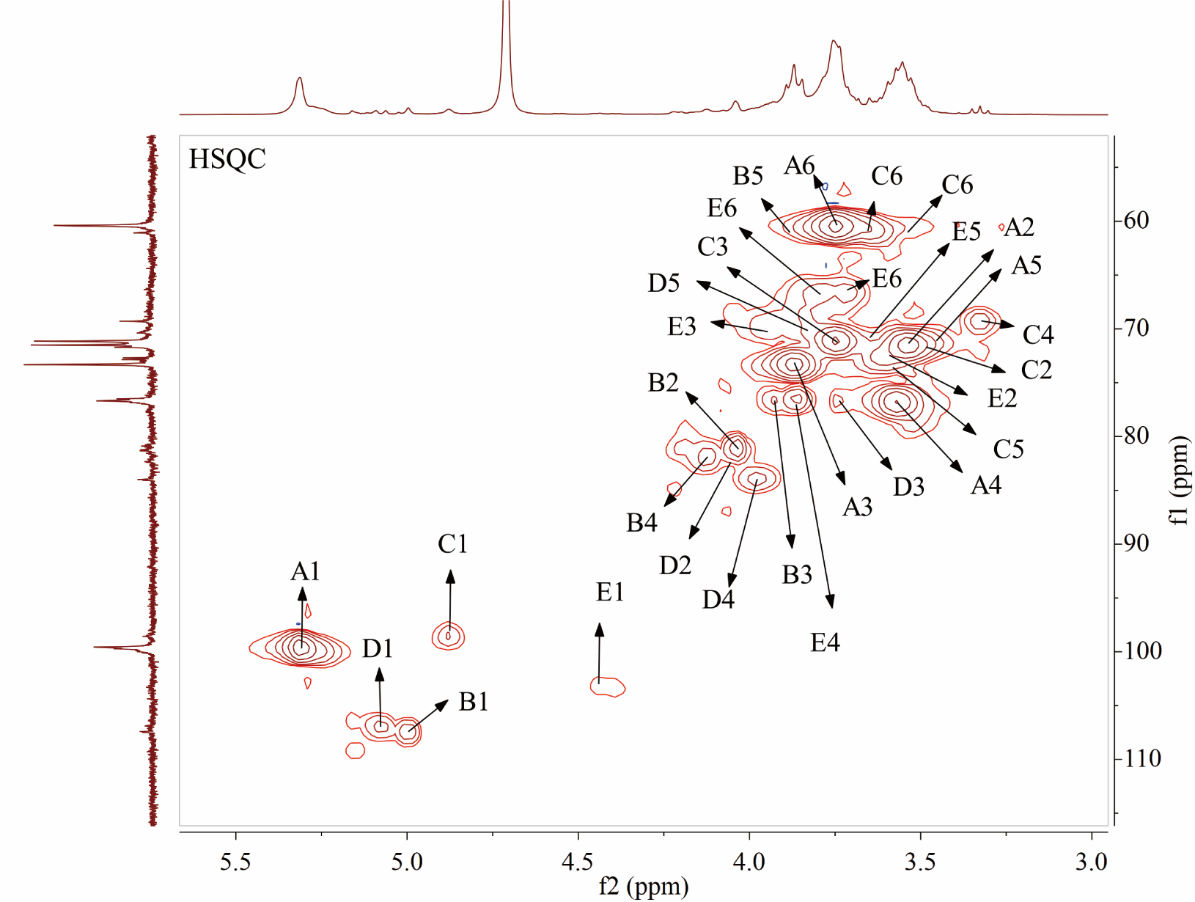
**

**Fig S5** HSQC spectrum.

**
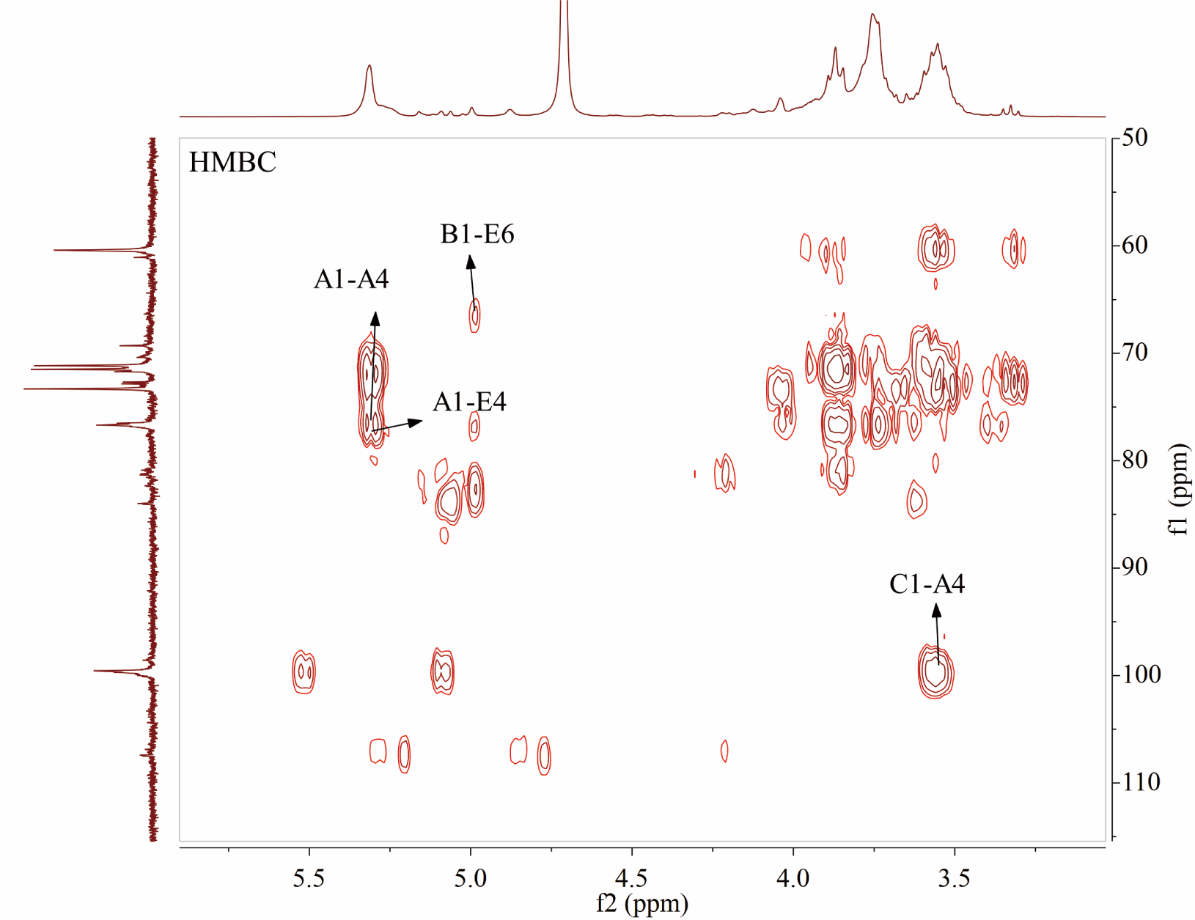
**

**Fig S6** HMBC spectrum.


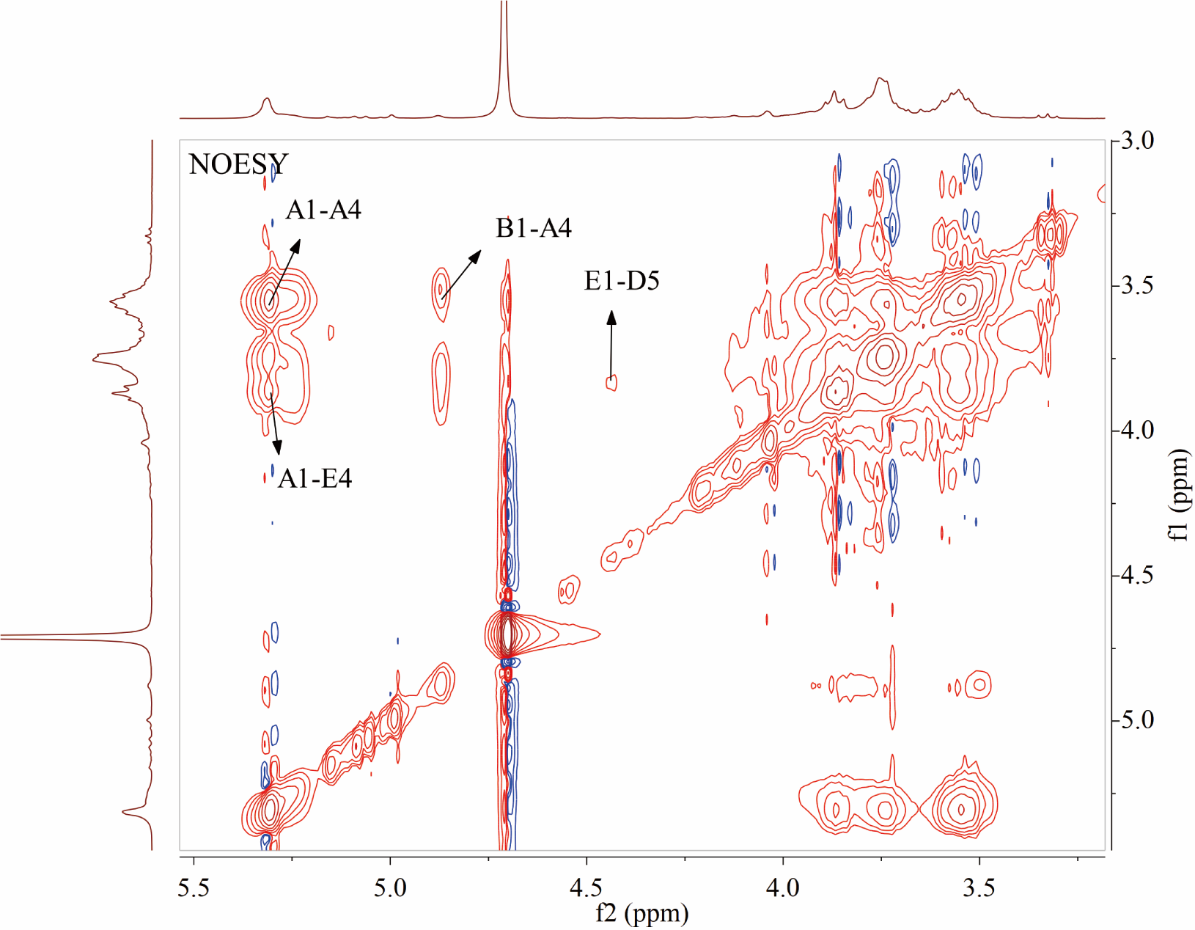


**Fig S7** NOESY spectrum.


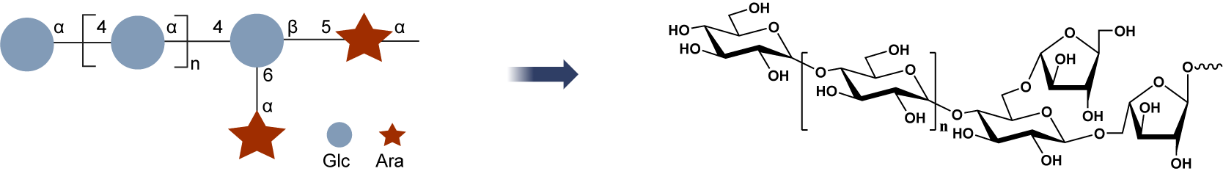


**Fig S8** The structure of NGUP.

**Table S1 Glycosidic residues analysis of NGUP by GC–MS.**

| Linking Method | Derivative name | RT | Relative molarity (%) |
| --- | --- | --- | --- |
| t-Ara(f) | 1,4-di-O-acetyl-2,3,5-tri-O-methyl arabinitol | 6.399 | 11.19 |
| t-Glc(p) | 1,5-di-O-acetyl-2,3,4,6-tetra-O-methyl glucitol | 9.435 | 8.77 |
| 5-Ara(f) | 1,4,5-tri-O-acetyl-2,3-di-O-methyl arabinitol | 11.183 | 7.11 |
| 4-Gal(p) | 1,4,5-tri-O-acetyl-2,3,6-tri-O-methyl galactitol | 13.541 | 3.40 |
| 4-Glc(p) | 1,4,5-tri-O-acetyl-2,3,6-tri-O-methyl glucitol | 14.722 | 64.69 |
| 3,4-Glc(p) | 1,3,4,5-tetra-O-acetyl-2,6-di-O-methyl glucitol | 16.882 | 1.24 |
| 4,6-Glc(p) | 1,4,5,6-tetra-O-acetyl-2,3-di-O-methyl glucitol | 18.996 | 3.61 |

**Table S2 1H and 13C chemical shifts of NGUP.**

| Code | Glycosyl residues | Chemical shifts (ppm) | | | | | |
| --- | --- | --- | --- | --- | --- | --- | --- |
| H1/C1 | H2/C2 | H3/C3 | H4/C4 | H5/C5 | H6a,b/C6 |
| A | →4)-α-D-Glc*p*-(1→ | 5.31 | 3.52 | 3.87 | 3.56 | 3.44 | 3.75 |
| 99.56 | 71.5 | 73.32 | 76.51 | 70.88 | 60.39 |
| B | α-L-Ara*f*-(1→ | 5 | 4.04 | 3.93 | 4.13 | 3.89 | / |
|  |  | 107.41 | 80.89 | 76.68 | 81.34 | 61.09 | / |
| C | α-D-Glc*p*-(1→ | 4.88 | 3.49 | 3.75 | 3.33 | 3.62 | 3.54,3.66 |
| D |  | 98.57 | 71.48 | 71.14 | 69.28 | 73.06 | 61.08 |
| →5)-α-L-Ara*f*-(1→ | 5.09 | 4.04 | 3.73 | 3.98 | 3.83 | / |
|  |  | 106.88 | 82.33 | 76.85 | 83.99 | 69.87 | / |
| E | →4,6)-β-D-Glc*p*-(1→ | 4.44 | 3.59 | 3.95 | 3.87 | 3.65 | 3.79,3.71 |
| 103.3 | 72.46 | 70.1 | 76.78 | 70.28 | 66.34 |

**
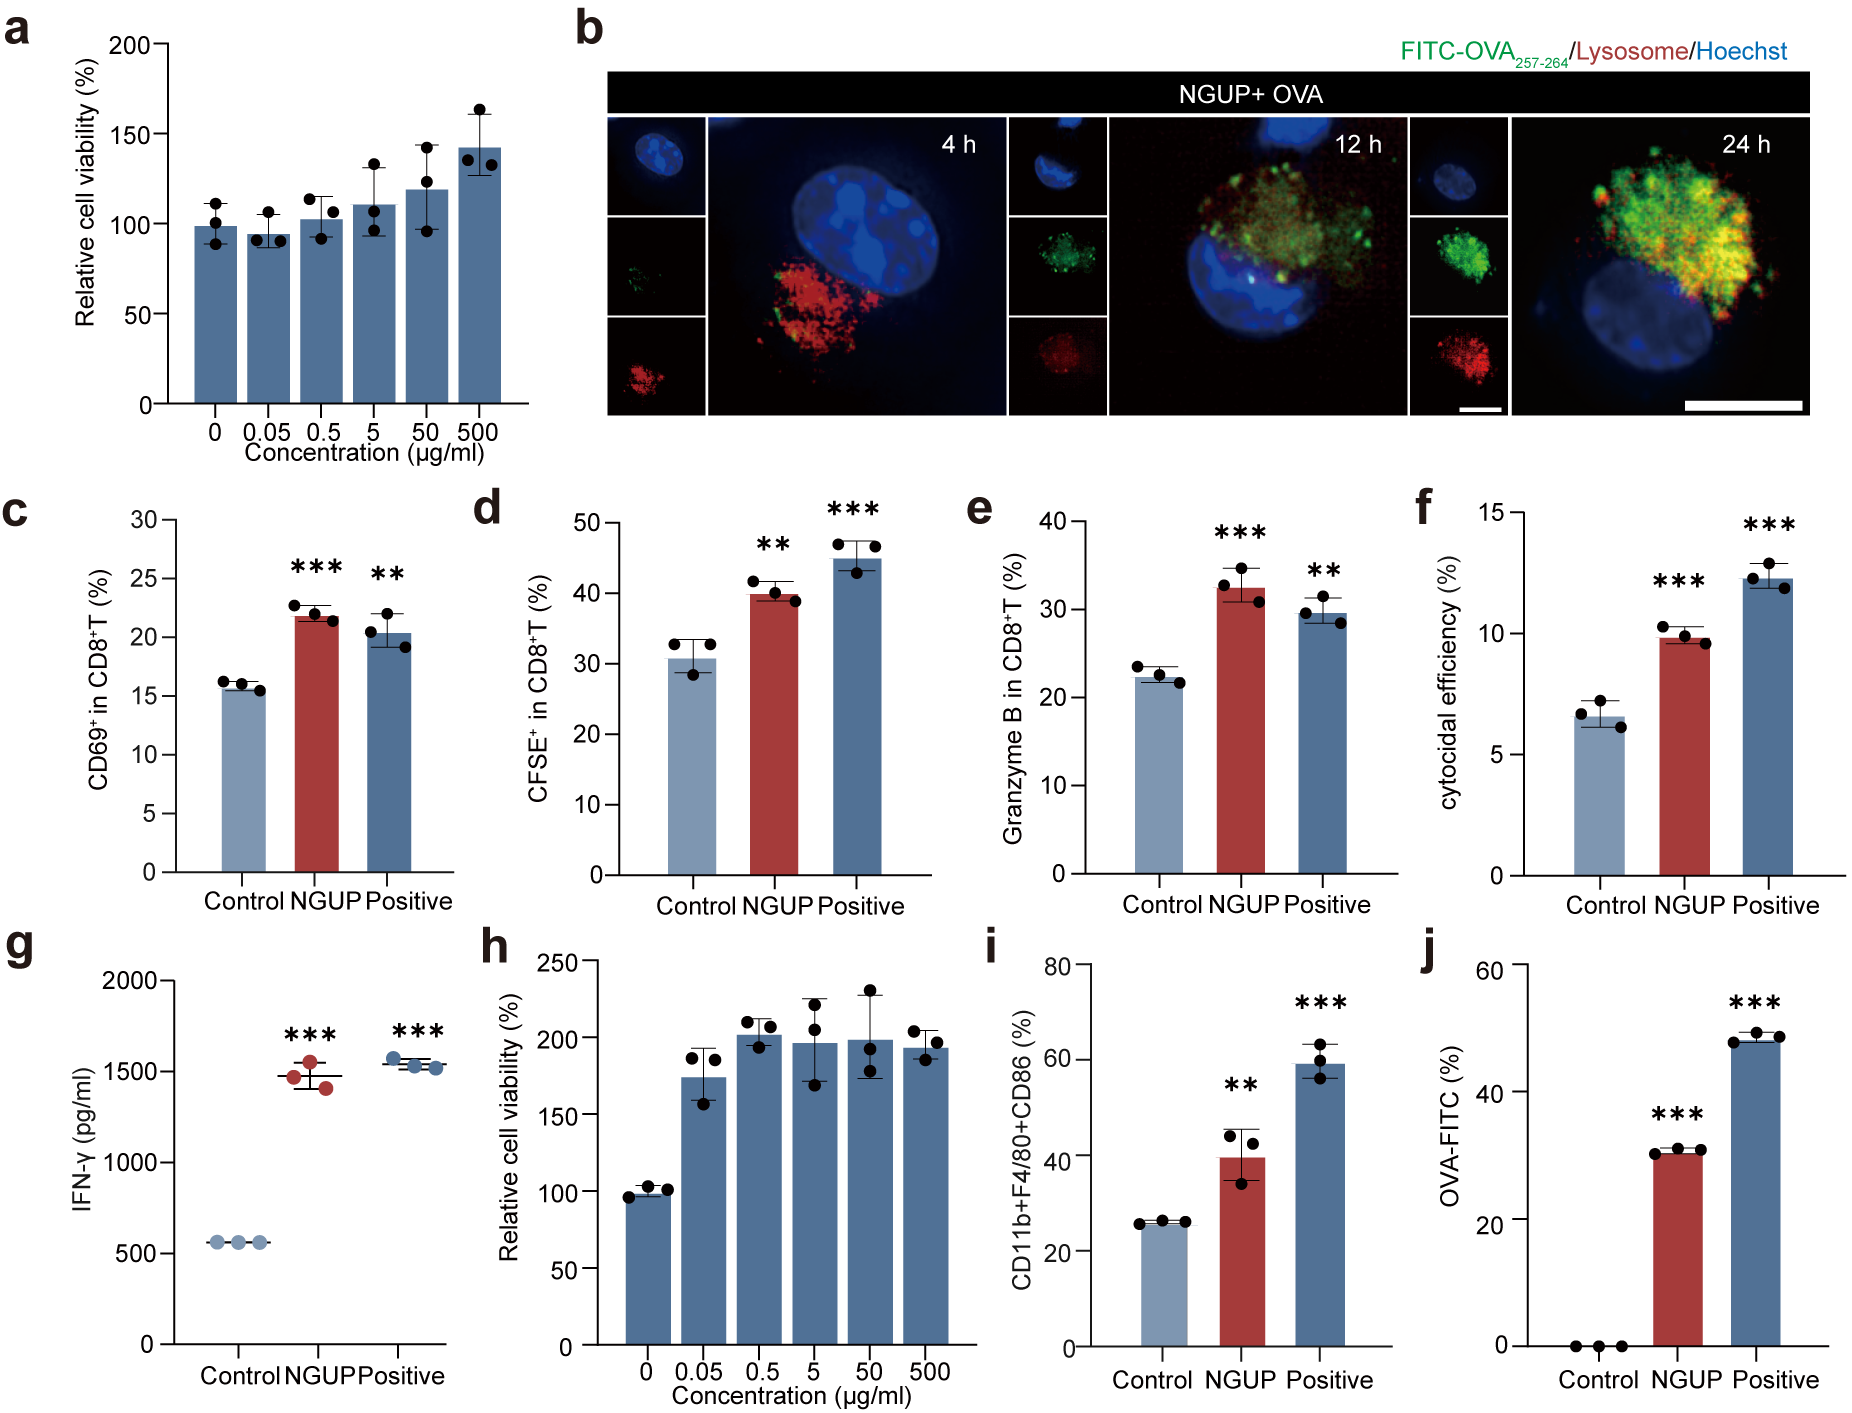
**

**Fig S9** (**a**) Cell viability of BMDCs after treatment with NGUP for 24 h. (**b**) CLSM images of antigen capture in BMDCs at 4, 12, or 24 h, respectively (Scale bars, 10 µm). (**c**) FCM analysis of the percentages of CD69+T lymphocytes in the co-incubation system.; (**d**) FCM analysis of the percentages of CFSE+T lymphocytes in the co-incubation system. (**e**) FCM analysis of the percentages of Granzyme B+T lymphocytes in the co-incubation system. (**f**) Quantification of tumor cell viability by crystal violet staining after 24 h co-culture with T cells. (**g**) FCM analysis of the percentages of IFN-γ+T lymphocytes in the co-incubation system. (**h**) Cell viability of BMDMs after treatment with NGUP for 24 h; (**i**) FCM analysis of the percentages of M1. (**j**) The intracellular uptake of FITC-OVA in BMDM cells was examined via FCM. Data are shown as mean ± S.D. (n = 3). Statistical significance: **P* < 0.05, ** *P* < 0.01 and *** *P* < 0.001 vs. Control; # *P* < 0.05, ## *P* < 0.01 and ### *P* < 0.001.

**
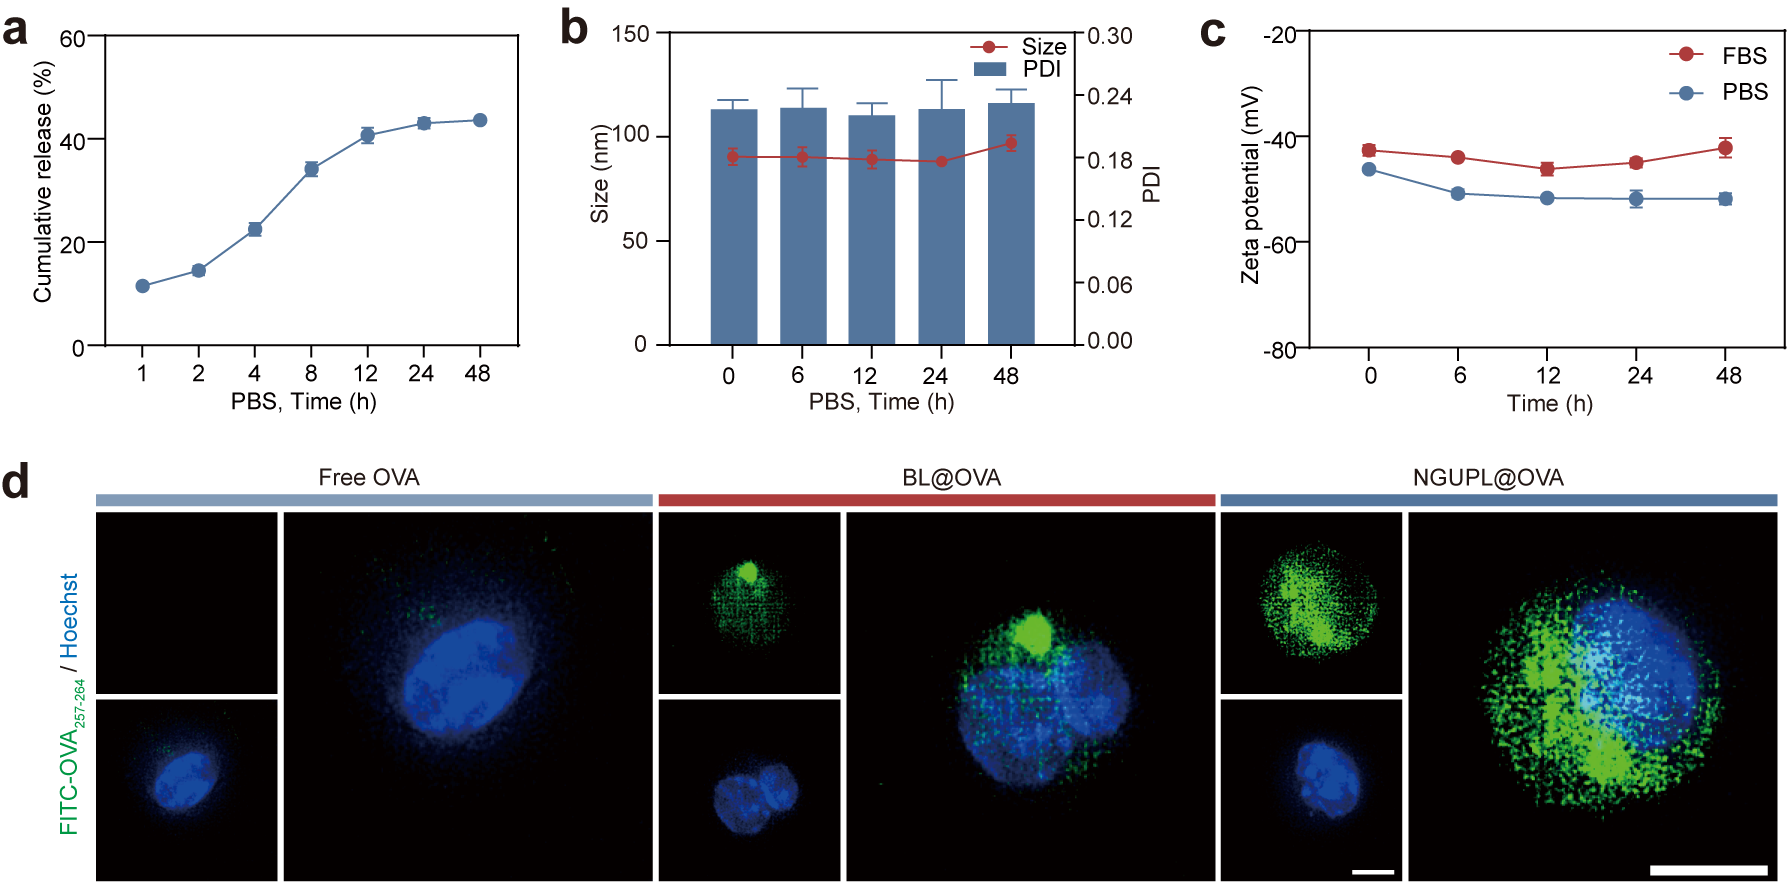
**

**Fig S10** Preparation and characterization of NGUPL@OVA. (**a**) OVA Release Curve. (**b**) Size and PDI stability from aqueous solutions in pH 7.4 of NGUP@OVA. (**c**) Zeta potentials stability from aqueous solutions in pH 7.4 and 10% FBS of NGUP@OVA. (**d**) FITC-conjugated in BMDCs was detected and quantified via CLSM at 2h (Scale bars, 10 µm). Data are shown as mean ± S.D. (n = 3). Statistical significance: **P* < 0.05, ** *P* < 0.01 and *** *P* < 0.001 vs. Control; # *P* < 0.05, ## *P* < 0.01 and ### *P* < 0.001.

**
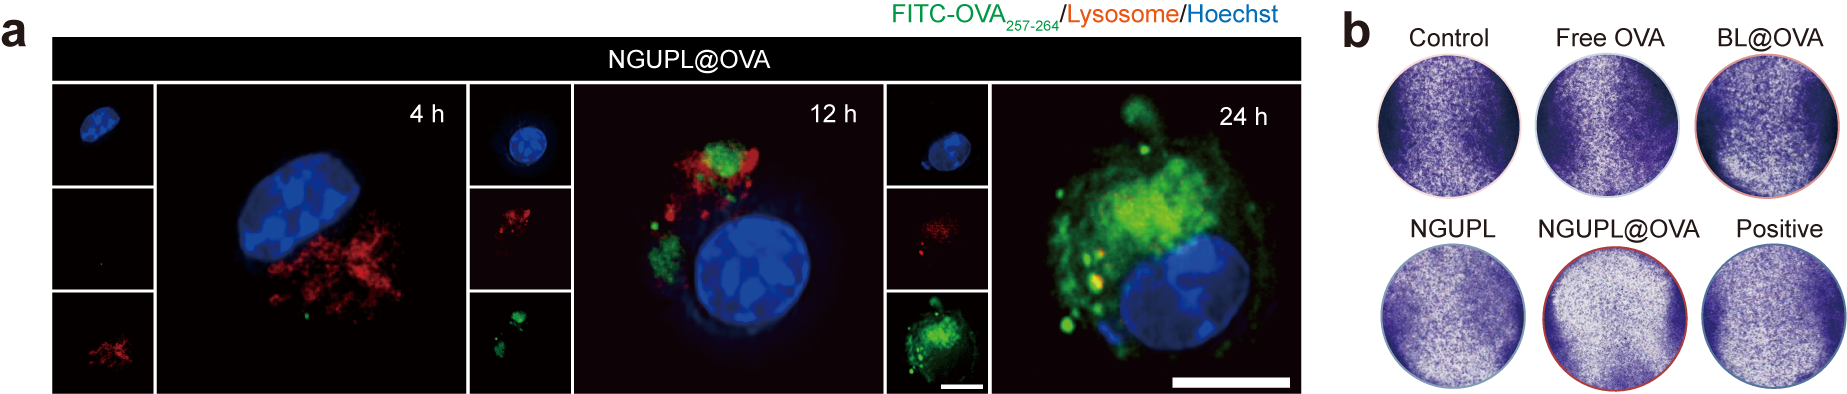
**

**Fig S11** (**a**) CLSM images of antigen capture in BMDCs at 4, 12, or 24 h, respectively (Scale bars, 10 µm). (**b**) Crystal violet staining image after co-culturing T cells with tumor cells. **
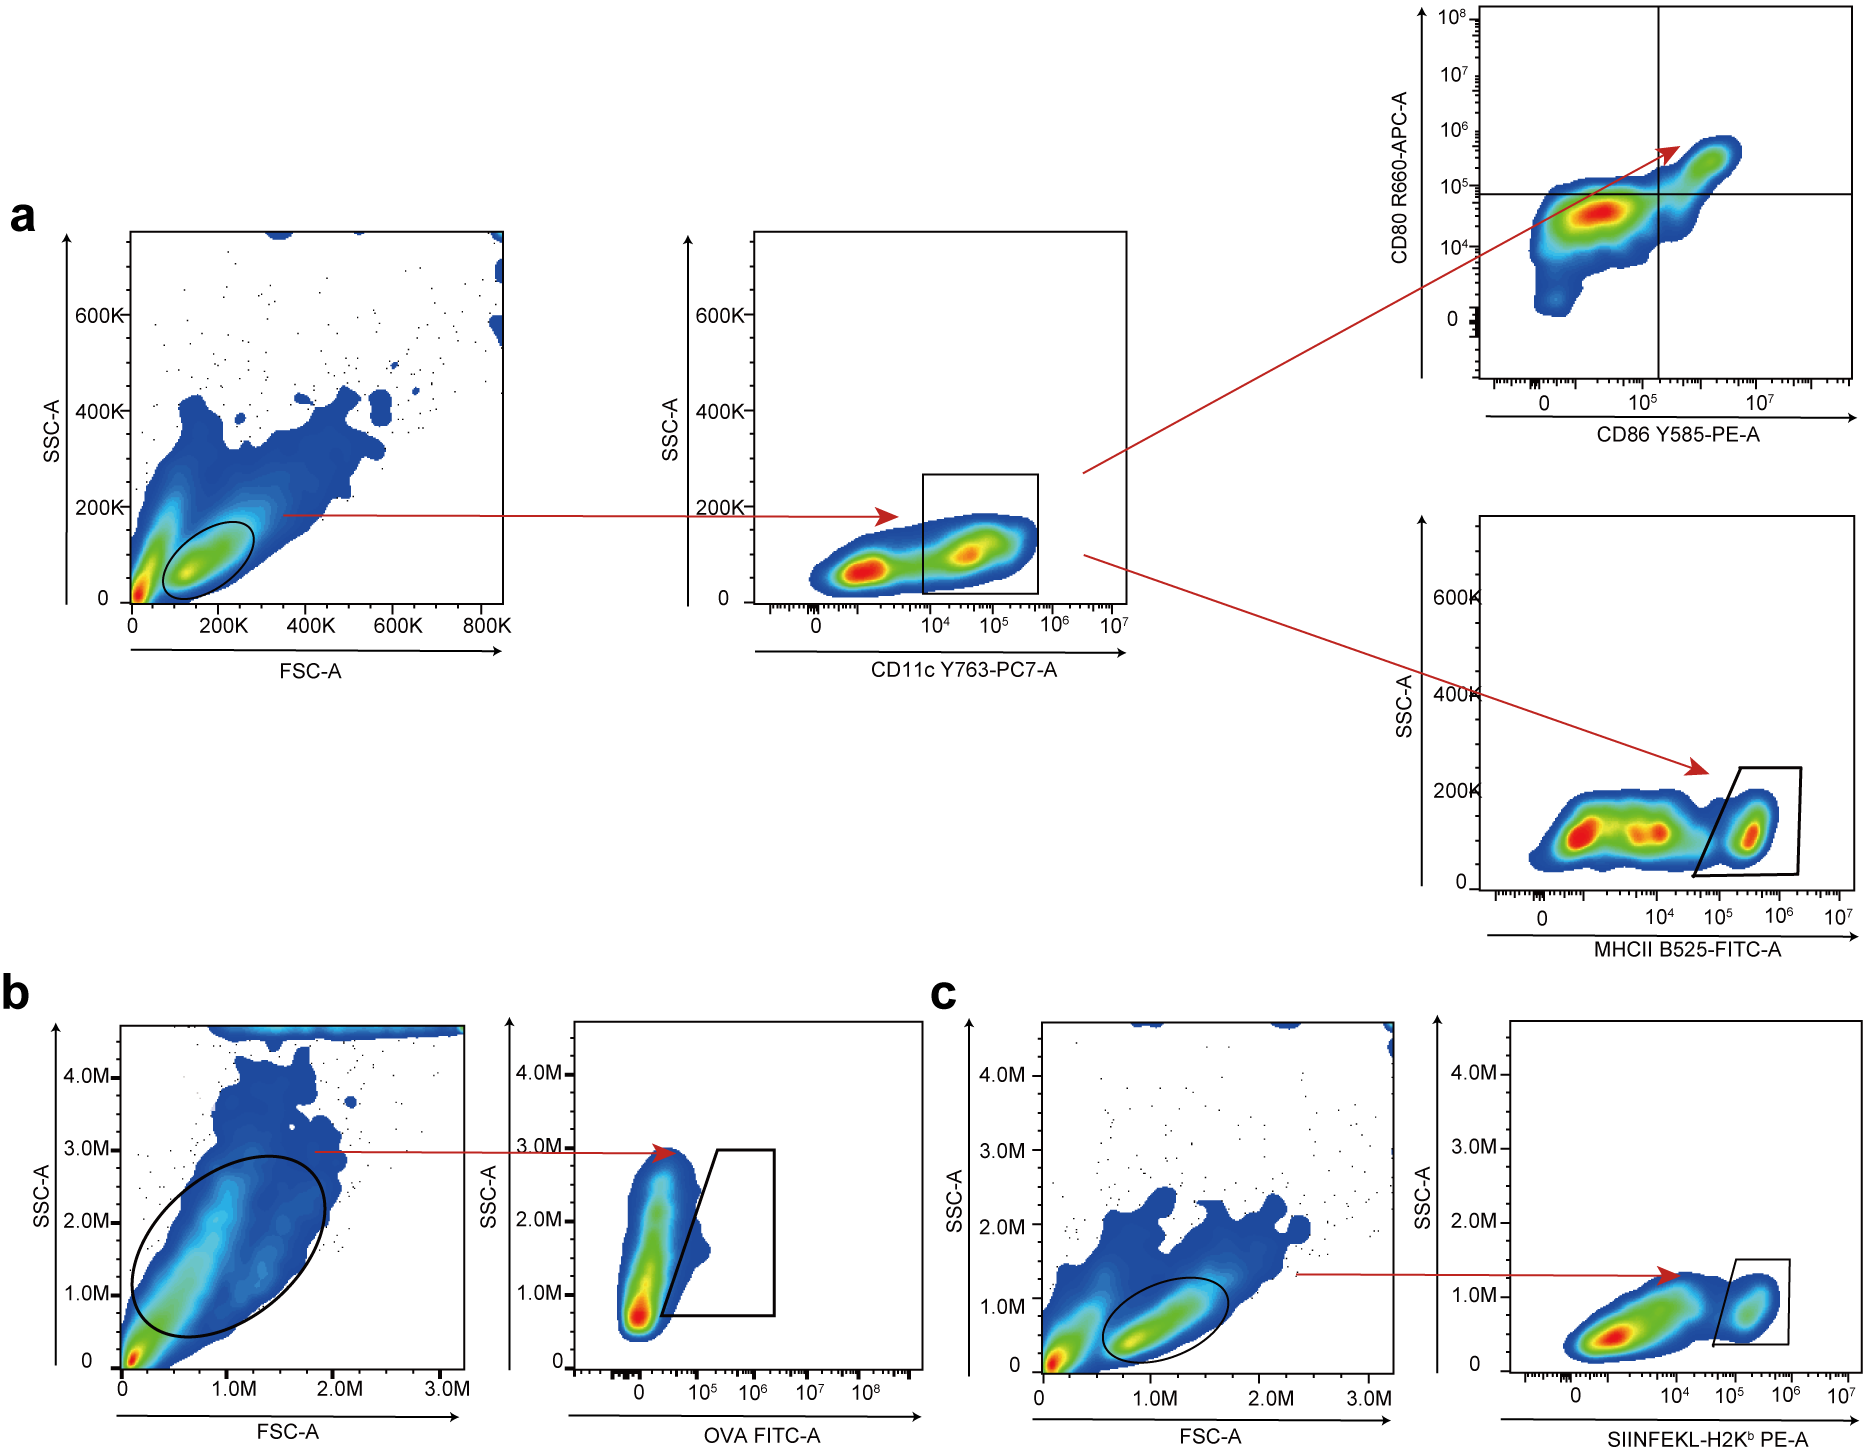
**

**Fig S12** Gating strategies used for FCM analysis of *in vitro* immune cells. (**a**) CD11C+ CD80+CD86+ or CD11C+MHCII+ BMDCs. (**b**) OVA-FITC+ BMDCs. (**c**) SIINFEKL-H2Kb+ BMDCs.

**
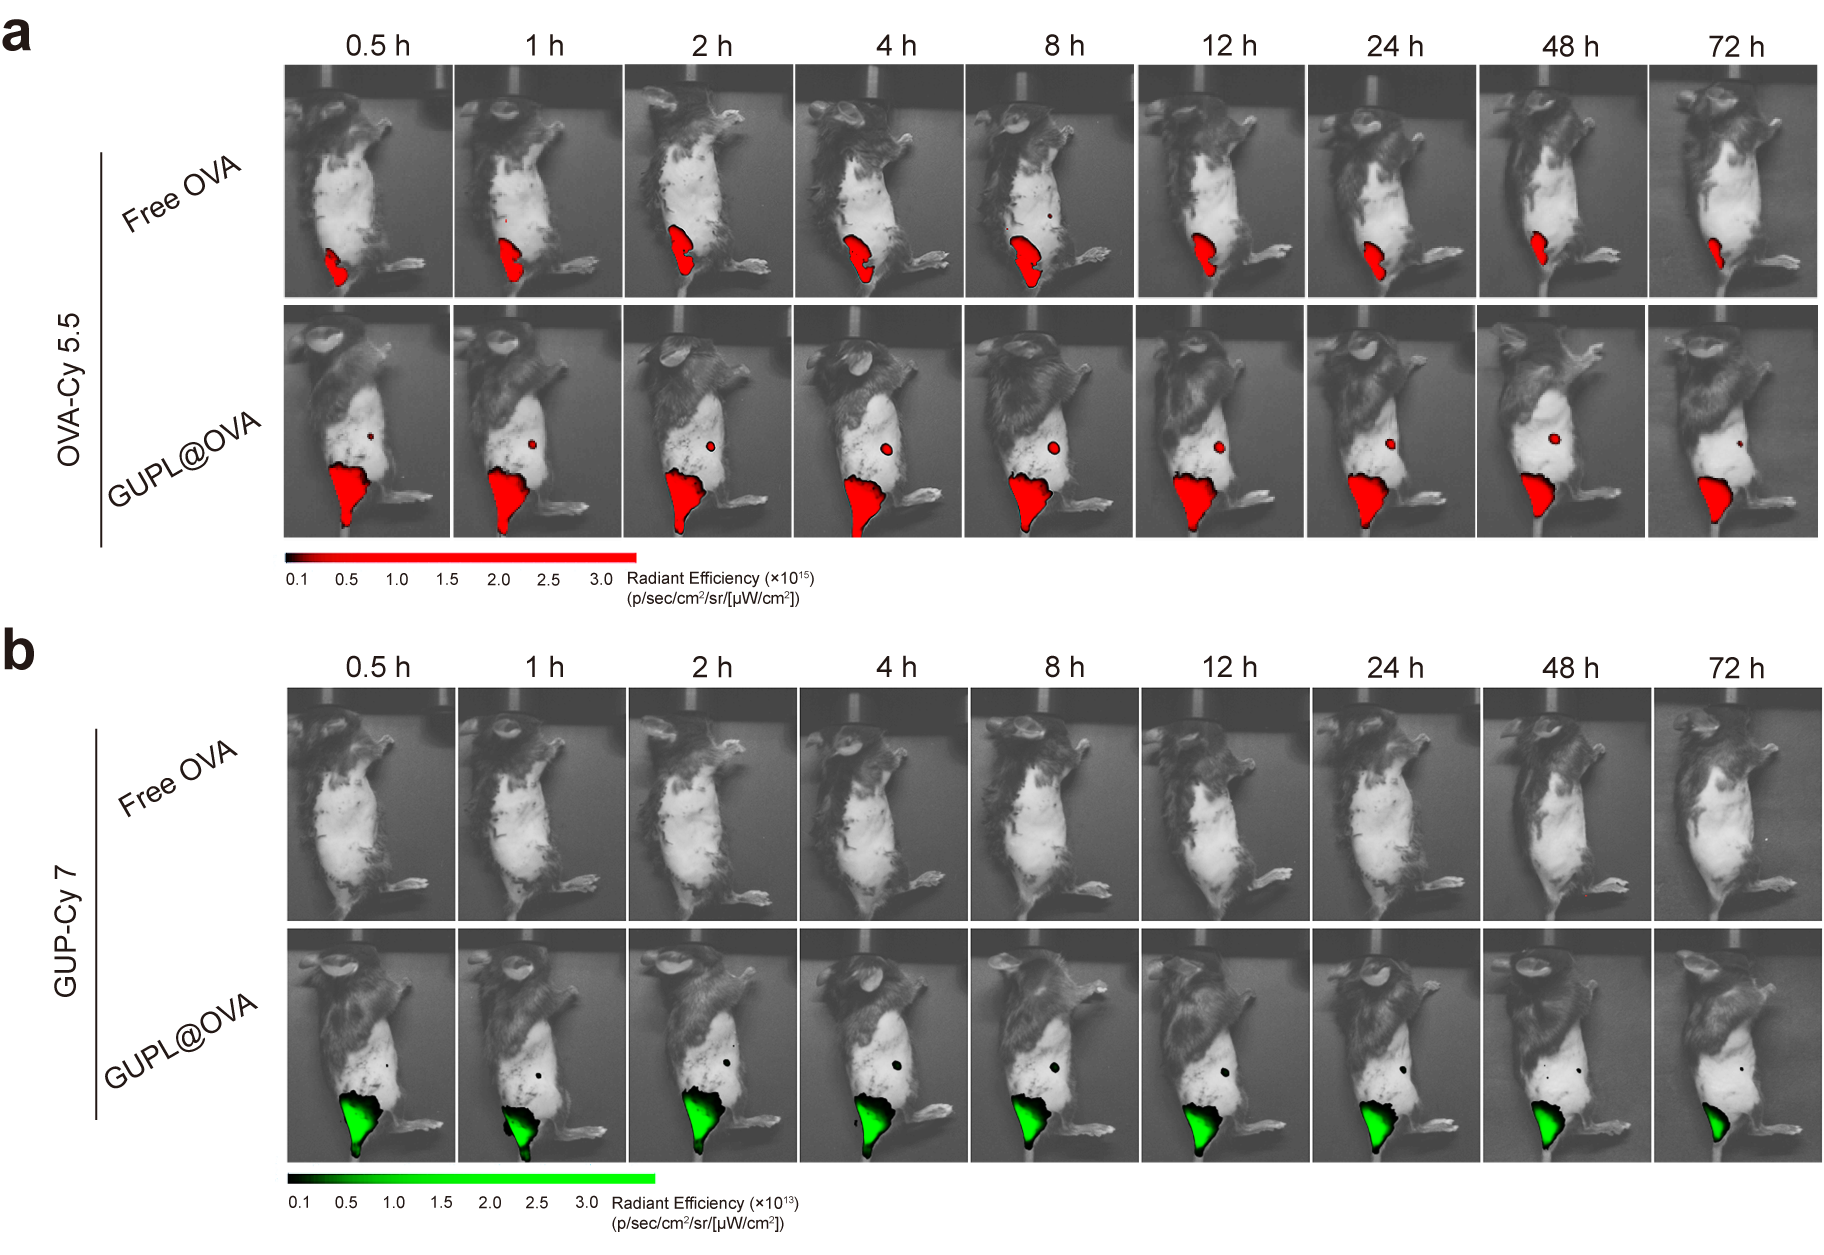
**

**Fig S13** NGUPL@OVA nanovaccines delivery and antigen presentation capabilities. (**a**) In vivo biodistribution imaging of OVA-Cy5.5 after subcutaneous administration in C57BL/6 mice at different time points using the IVIS Spectrum system. (**b**) In vivo biodistribution imaging of GUP-Cy7 after subcutaneous administration in C57BL/6 mice at different time points using the IVIS Spectrum system. Data are mean ± SD, n = 3.


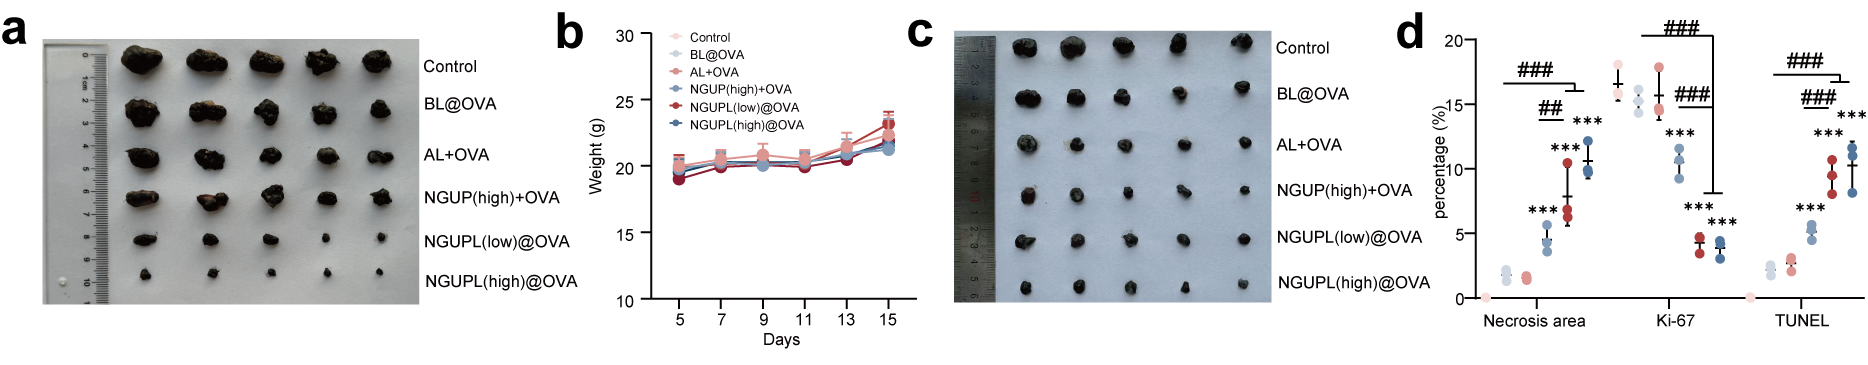


**Fig S14** Tumor suppression efficacy of the NGUP@OVA in mice bearing B16-OVA tumours. (**a**) Tumor Image of different groups of the prophylactic B16-OVA tumor model (n=5). (**b**) Body weight of different groups of the prophylactic B16F10 tumor model. (**c**) Tumor Image of different groups of the therapeutic B16-OVA tumor model (n=5). (**d**) Quantification of H&E, Ki-67, and TUNEL staining regions in tumour samples collected from different groups on day 16 (n=3). Data are mean ± SD, n = 3; *P < 0.05, ** P < 0.01 and *** P < 0.001 vs. Control; # P < 0.05, ## P < 0.01 and ### P < 0.001.

**
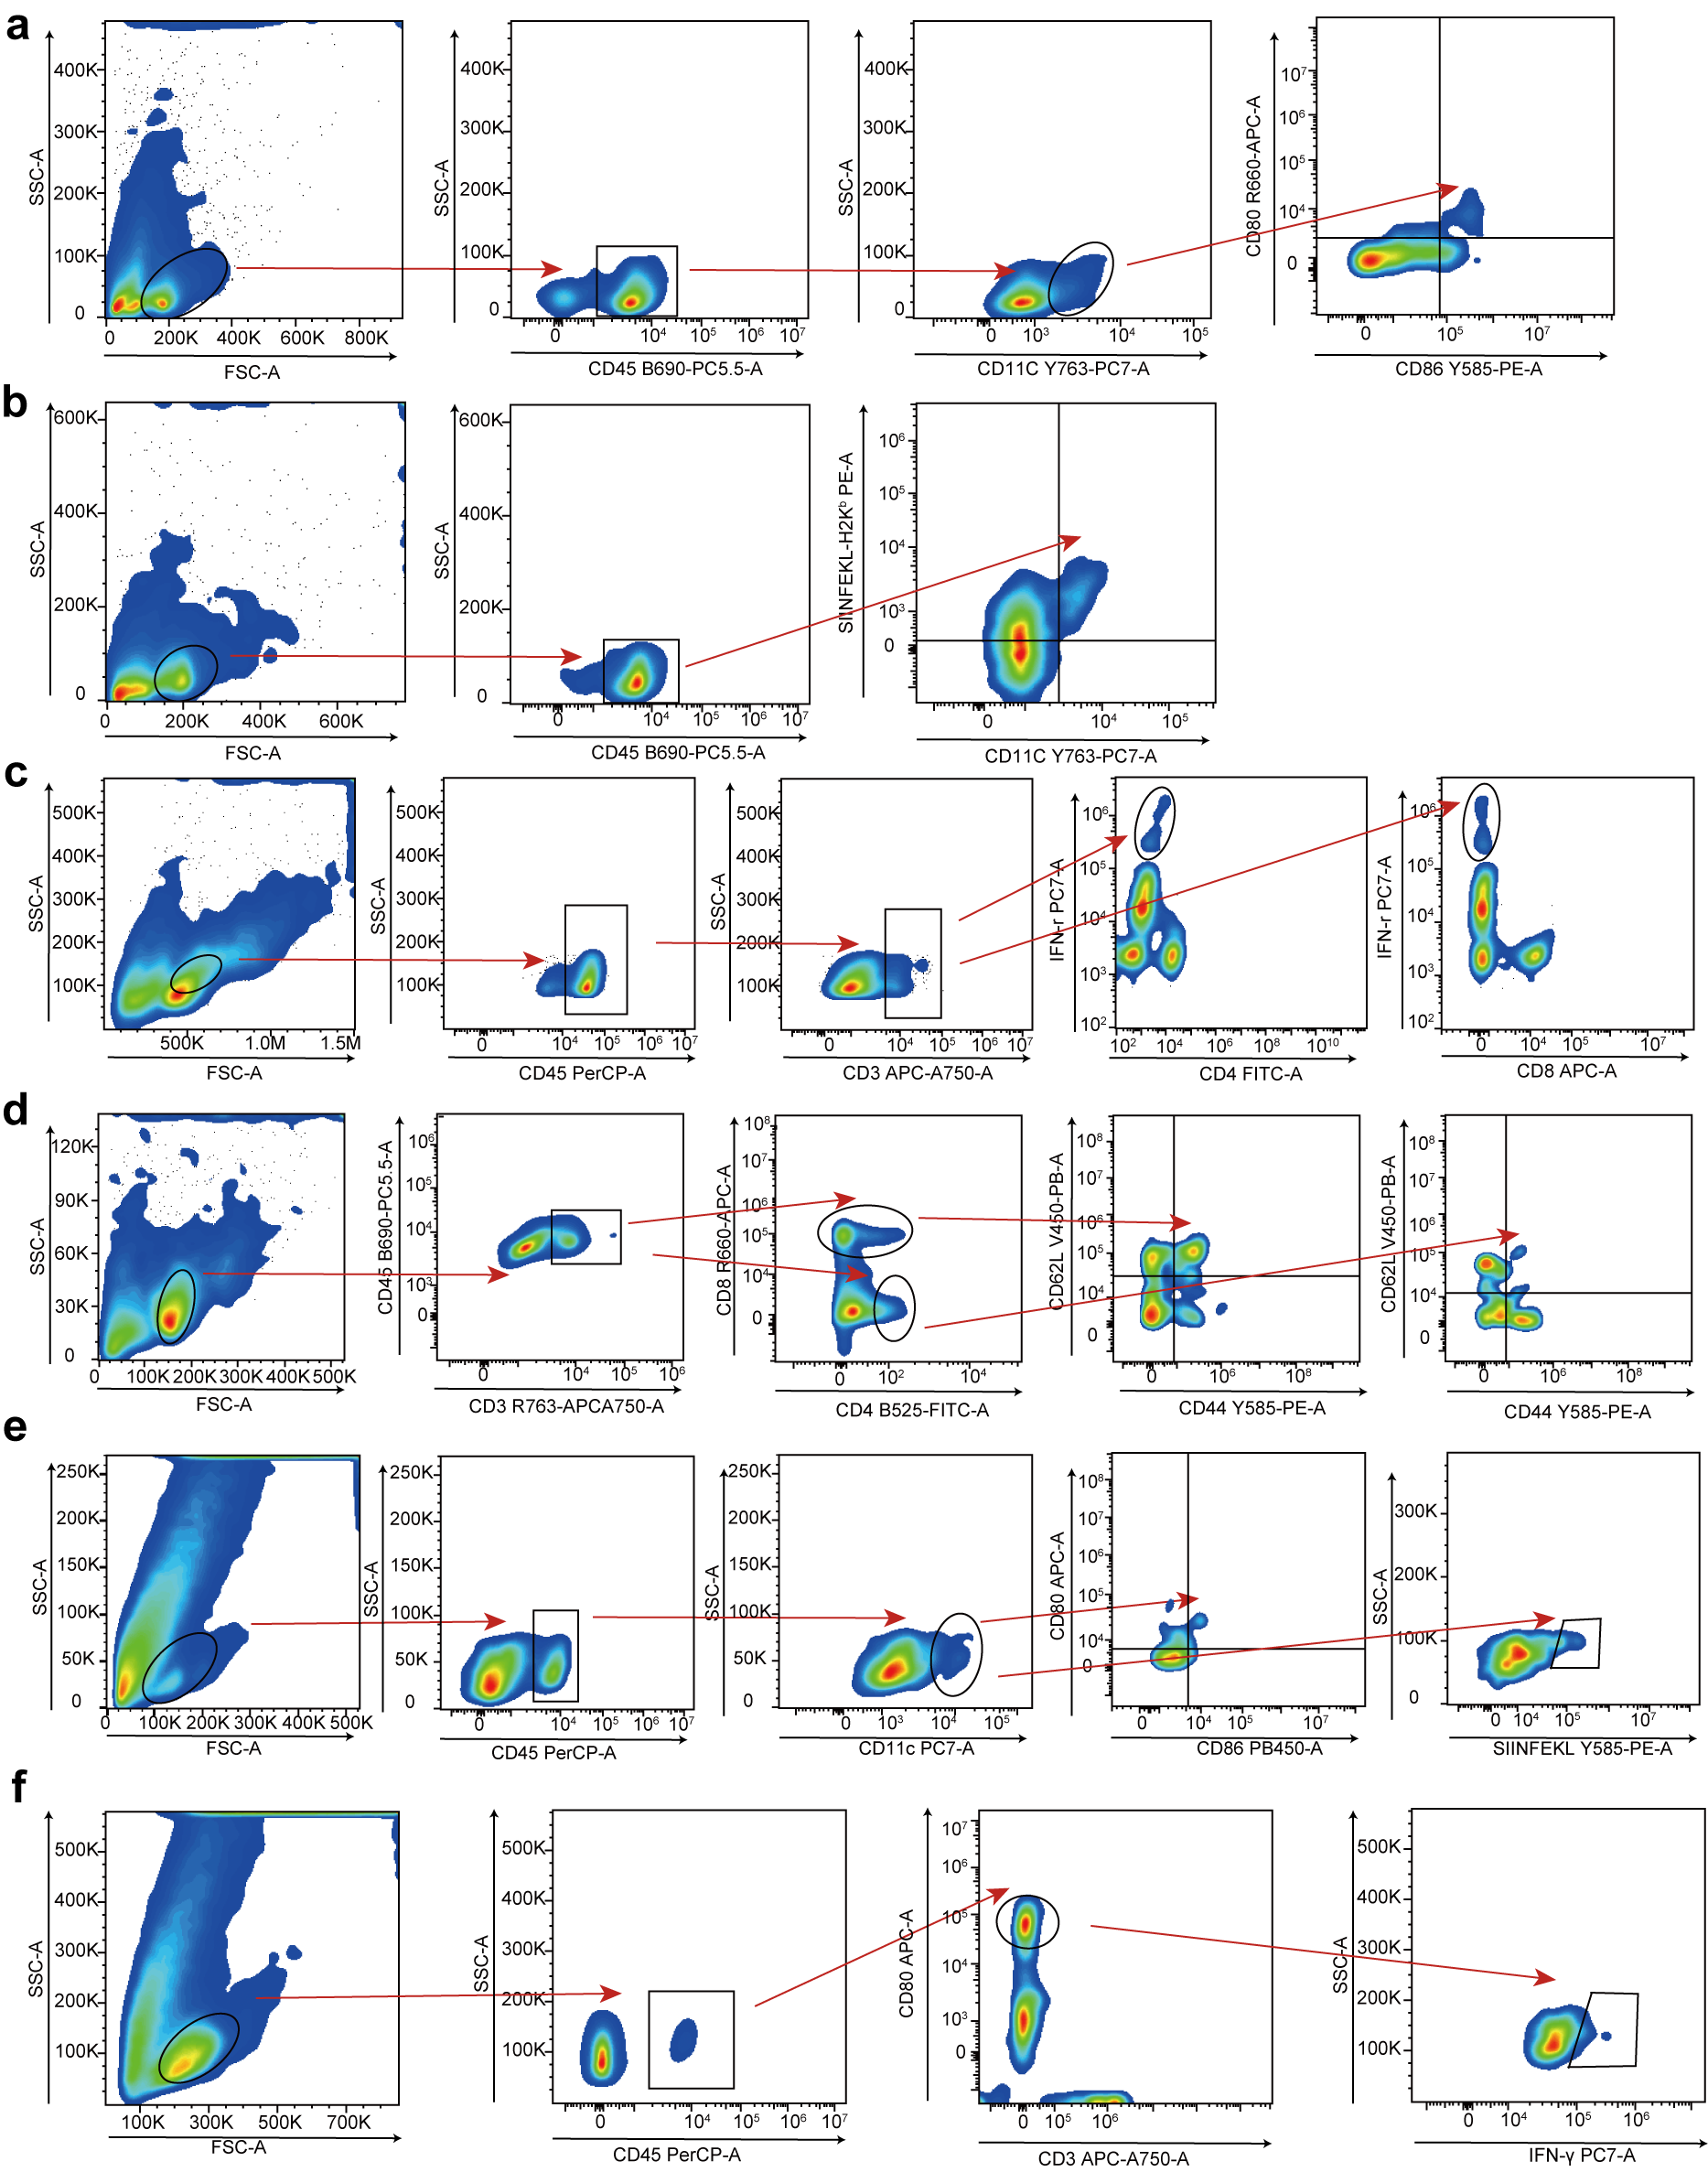
**

**Fig S15** Gating strategies used for FCM analysis of *in vivo* immune cells. (**a**) CD45+CD11C+ CD80+CD86+ in lymph nodes. (**b**) CD45+CD11C+ SIINFEKL-H2Kb+ in lymph nodes. (**c**) CD45+CD3+CD4+ and CD45+CD3+CD8+ T cells in spleen. (**d**) CD45+CD3+CD4+ CD44+CD62L+ and CD45+CD3+CD8+ CD44+CD62L+ T cells in spleen. (**e**) CD45+CD11C+ CD80+CD86+ and CD45+CD11C+ SIINFEKL-H2Kb+ in tumours. (**f**) CD45+CD3+CD8+ T cells in tumours.
